# Supplementary material for: Estimating Orientation of Flying Fruit Flies
Source: PLOS journal article supplement (doi:10.1371/journal.pone.0132101), 2015-07-14
Supplement: S2 (10.1371/journal.pone.0132101.s002) [file journal.pone.0132101.s002]

We implemented a parameterized generative shape  $\Upsilon^3(X_t, O_t, \tilde{l})$  in term of a profile curve revolving around the *center-axis*. The *center-axis* is a line-segment which is defined by  $\{X_t(x, y, z), O_t(\theta, \phi), \tilde{l}\}$ . A similar idea of generating shape model had been presented by Fontaine *et al.* [1].

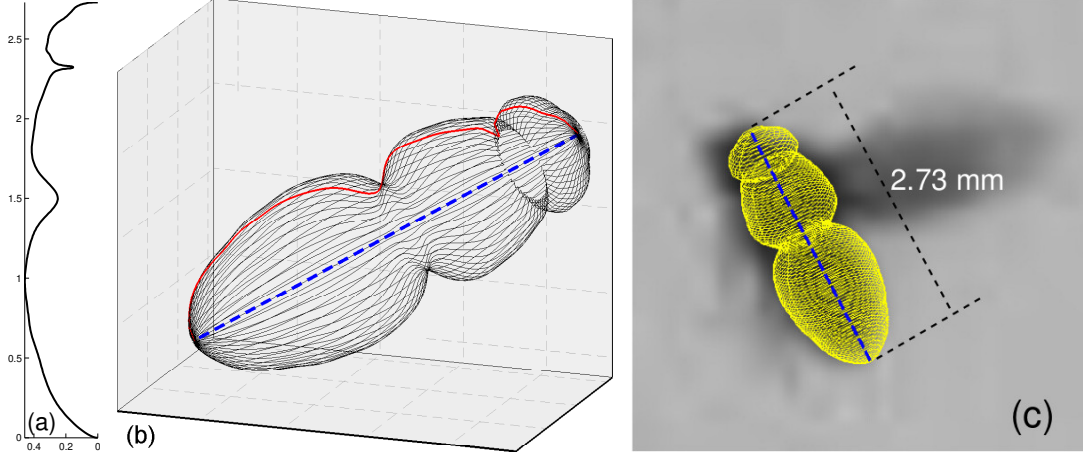

**Figure 1. The generative shape model of *Drosophila*.** (a) The profile curve, denotes by  $\rho$ . (b) The shape  $\Upsilon^3$  is generated by the profile curve  $\rho$  revolving around the *center axis* in 3D space. (c) An image of a fruit fly overlaid by the shape model. The average body length is  $\tilde{l} = 2.73$  mm in our experiments.

## References

1. Fontaine EI, Zabala F, Dickinson MH, Burdick JW (2009) Wing and body motion during flight initiation in *Drosophila* revealed by automated visual tracking. J Exp Biol 212: 1307-1323. [1](#)
